# Supplementary material for: Biallelic mutations in WRAP53 result in dysfunctional telomeres, Cajal bodies and DNA repair, thereby causing Hoyeraal–Hreidarsson syndrome
Source: PubMed Central journal article supplement (PMC7165179; doi:10.1038/s41419-020-2421-4), 2020-04-17
Supplement: 41419_2020_2421_MOESM2_ESM.pdf [file 41419_2020_2421_MOESM2_ESM.pdf]

Please complete the table below to indicate the contributions of all named authors to the figures.

Figure 1:

|  |
|--|
|  |
|--|

Figure 2:

|  |
|--|
|  |
|--|

Figure 3:

|  |
|--|
|  |
|--|

Figure 4:

|  |
|--|
|  |
|--|

Figure 5:

|  |
|--|
|  |
|--|

Figure 6:

|  |
|--|
|  |
|--|

Signed for and on behalf of the Author(s):

*Marianne Farnes*

Print Name:

|  |
|--|
|  |
|--|

Date:

|  |
|--|
|  |
|--|
